# Supplementary material for: Construction of Infectious cDNA Clone of Brassica Yellows Virus Isolated from Strawberry and Establishment of TaqMan RT-qPCR
Source: MDPI journal article supplement (doi:10.3390/plants11233380), 2022-12-05
Supplement: s1 [file s1]

**Supplementary Table S1.** Primers and TaqMan probe used for BrYV detection in RT-PCR and real-time RT-PCR

| Primers                          | Sequences (5' -3')                             | Position  |
|----------------------------------|------------------------------------------------|-----------|
| <b>BrYV amplification</b>        |                                                |           |
| BrYV-gap1-F                      | ACGTGCCAGGAACCAAGAC                            | 354-372   |
| BrYV-gap1-R                      | CATTTCGGTGTAGACCGAAGAGC                        | 750-772   |
| BrYV-gap2-F                      | ATCGGGATCCATCCCGCATTG                          | 1910-1930 |
| BrYV-gap2-R                      | TCCGGATCAGCTCCTCAGGT                           | 2341-2360 |
| BrYV-gap3-F                      | ATGGTACAATCTCCTTTCACG                          | 4595-4615 |
| BrYV-gap3-R                      | ATTCTTGTGTCCTCAGAAC                            | 4391-4951 |
| 5'RACE                           | GCGAGCTCCACAAGCGTGTGAGACC                      | 543-567   |
| 3'RACE                           | AGGAGGTTGCTTGTGTCGGCAG                         | 5199-5222 |
| <b>Homologous reorganization</b> |                                                |           |
| czBrYV-F                         | <u>ATTCATTTGGAGAGGACAAAAGAAACCAGGAGGGAATCC</u> | 1-24      |
| czBrYV2845-R                     | <u>CGGATGGGTTTGGGCTAAAAGGGTACCATCGCTCAG</u>    | 2810-2845 |
| czBrYV2829-F                     | <u>TAGCCCAAACCCATCCGGGCGTTCAGAAAAGTGGG</u>     | 2829-2863 |
| czBrYV-R                         | <u>ACAGGGTATCGGATCCACACCGAAGTGCCGTAGGG</u>     | 5648-5666 |
| <b>RT-qPCR</b>                   |                                                |           |
| BrYVqp-F                         | GCCTCCGGTACATTGAGAATGA                         | 4241-4262 |
| BrYVqp-R                         | CCTTGTTAGGGTCGGTGGT                            | 4402-4420 |
| BrYV4395-F                       | AGCAAGTACCACCGACCCTA                           | 4395-4414 |
| BrYV4981-R                       | GAAACATTTCGAGTCCCGGGT                          | 4962-4981 |
| BrYVq pro                        | HEX-ACATGAACTGGACCAACGTGGACGCCC- BHQ-2         | 4265-4291 |
| <b>Virus Detection</b>           |                                                |           |
| BrYV-CP-F                        | ATGAATACGGTCGTGGGTAG                           | 3472-3491 |
| BrYV-CP-R                        | CTATTGTTGGATTATGGAATTGGC                       | 4058-4080 |

Note: The underlined sequences indicate the regions of the recombination sites

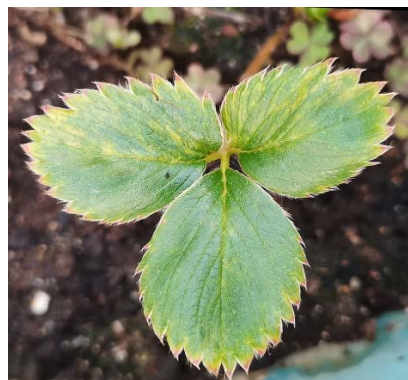

**Figure S1:** The photos of BrYV infected strawberry plants.
